# Supplementary material
Source: Elsevier journal article supplement (https://rcastoragev2.blob.core.windows.net/b49a755820fbeb3fa9f0ba57bd999e0f/mmc1.pdf)
Supplement: mmc1 [file mmc1.pdf]

Current Biology

Supplemental Information

## **Active Interpersonal Touch**

### **Gives Rise to the Social Softness Illusion**

Antje Gentsch, Elena Panagiotopoulou, and Aikaterini Fotopoulou

**A**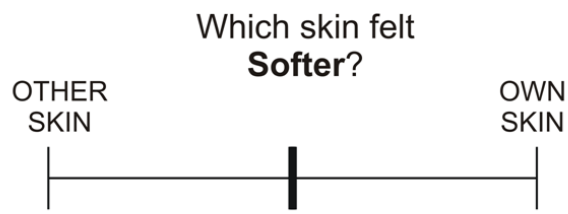**B**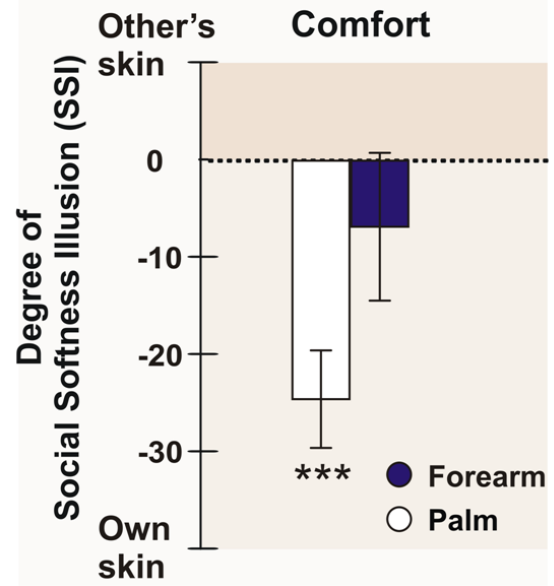

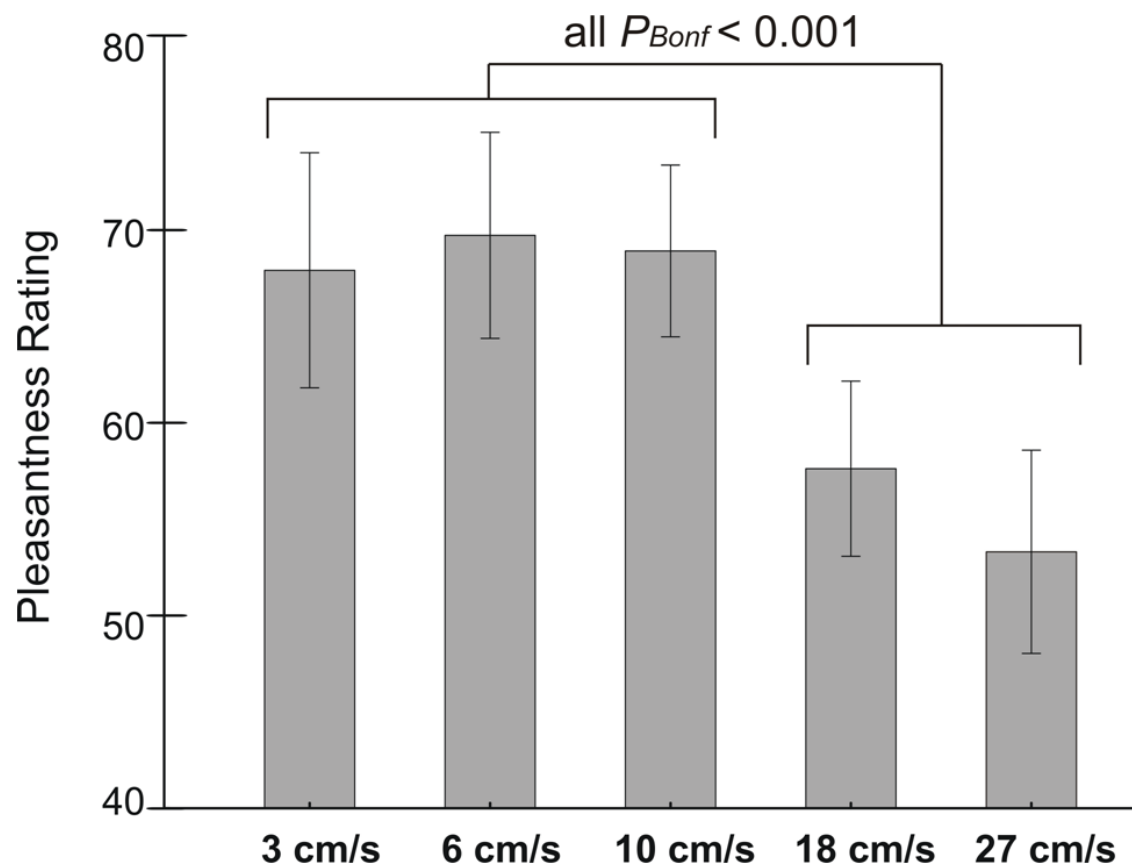

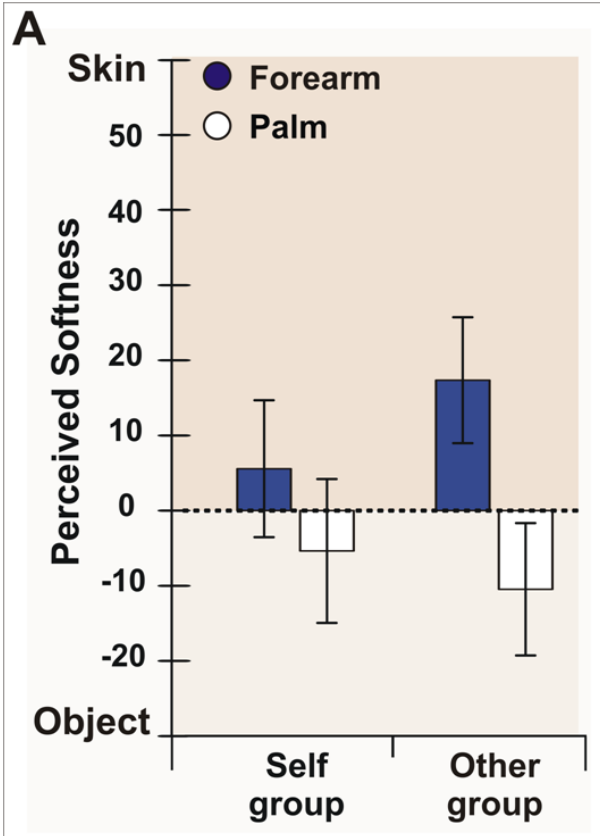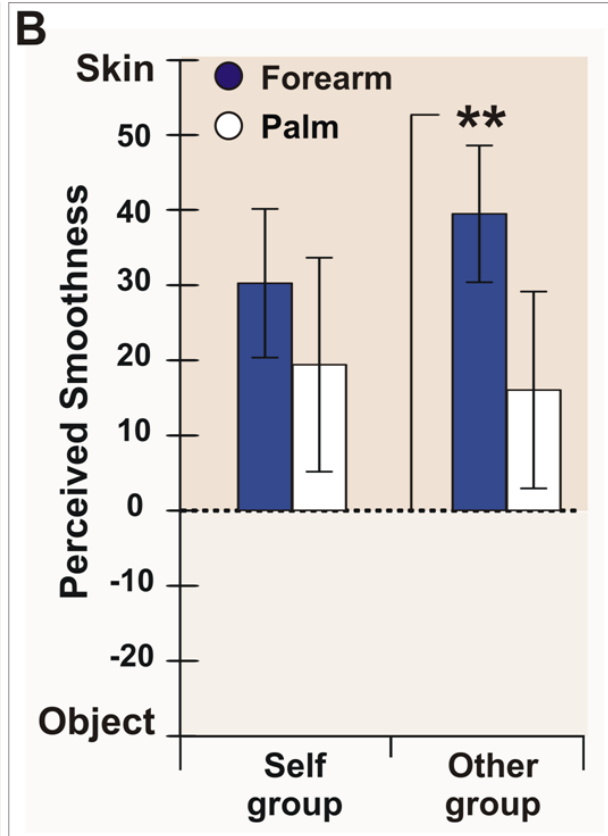

**Figure S1. Visual Analogue Scale and Comfort Ratings of Experiment 1 (related to Figure 1).**

**(A)** Example of a visual analogue scale (VAS) used for making comparative judgments between experiences during self-touch (touch of one's own skin) and other-touch (touch of the other's skin) on different perceptual attributes of the skin; the scale shown refers to softness sensations (scales were identical for other sensory and affective attributes). After each experimental trial involving self-touch and other-touch, participants were asked to indicate whether the experience of softness differed between both conditions (reflected in the dichotomous left-right judgment for other vs. self) and to which degree they felt their own skin or the other's skin to be softer (reflected in the continuous VAS score ranging from zero difference, midpoint, to an extreme difference in softness experience, endpoints). The assignment of the anchor labels, 'other skin' and 'own skin', to the two VAS endpoints was counterbalanced across participants.

**(B)** Comparative judgments of comfort between self-touch and other-touch are shown separately for stroking of the forearm and palm. Bars show means and standard error of the means ( $\pm$ SEM).

### **Figure S2. Results of Experiment S2 (related to Figure 2A).**

Experiment S2 tested whether the stimulation velocities applied in Experiment 2 indeed modulate affective experience in response to passive touch. This additional data was obtained as part of a previous experiment (unpublished data), in which pleasantness thresholds for passive touch experience were explored across a range of stroking velocities for later use as experimental stimulation levels. A trained experimenter delivered manual strokes with a soft brush at five different velocities (3cm/s, 6cm/s, 10cm/s, 18cm/s and 27cm/s) to the forearm of 51 healthy adults. Participants were asked to verbally rate pleasantness from 0 (not at all pleasant) to 100 (very pleasant) separately for each stroking velocity (with four repetitions per velocity, applied in random order). Figure S2 shows mean pleasantness ratings with standard deviations at different stroking velocities. The results show that slow CT optimal stroking at 3 cm/s, 6 cm/s or 10 cm/s is experienced as significantly more pleasant than faster less optimal stroking at 18 cm/s or 27 cm/s (all  $P_{Bonf} < 0.001$ ), without any difference between the slow velocities or between the fast velocities (all  $P_{Bonf} > 0.69$ ). These results are an additional confirmation that the stimulation levels used in Experiment 3 are an effective experimental manipulation of passive pleasure experience.

### Figure S3. Results of Experiment S3 (related to Figure 3).

Perceptual judgments of (A) softness and (B) smoothness for touch of the forearm skin and palm skin as compared to different fabrics (see below for Experimental Procedures of Experiment 3), assessed separately in individuals touching their own skin ('Self' group,  $N = 12$ ) and individuals touching another's skin ('Other' group,  $N = 13$ ). Repeated measures ANOVAs calculated on mean VAS scores for each measure (softness, smoothness) with the factors Site (palm, forearm) and Group (self, other) revealed a significant main effect of Site for both softness ( $F(1, 22) = 13.73, P < 0.01$ ) and smoothness ( $F(1, 22) = 5.79, P < 0.05$ ). Effects involving the factor Group failed to reach significance (all  $P > 0.12$ ). In order to specifically assess differences in the hypothesized direction of softness and smoothness judgments (i.e., the skin judged as being softer and smoother than fabric), one-sided t-tests against zero (i.e., no difference between skin and fabric) were performed on mean VAS ratings. Bonferroni correction was applied for eight comparisons (i.e., separate tests for softness and smoothness judgments of palm and forearm in both groups). In the Other-group, there was a tendency of the other's forearm being rated softer than fabrics, and the palm rated less soft than fabrics, but these tendencies did not reach statistical significance ( $P_{Bonf} > 0.12$ ). Smoothness ratings revealed a significant effect on the forearm ( $P_{Bonf} < 0.01$ ), indicating that the other's skin on the forearm was perceived as smoother relative to fabrics, but not on the palm ( $P_{Bonf} > 0.9$ ). In the Self-group, there were no significant differences in the comparison of skin and fabrics regarding softness (all  $P_{Bonf} > 0.59$ ) or smoothness (all  $P_{Bonf} > 0.11$ ). These results provide an additional confirmation that another person's skin is experienced as smoother than one's own skin even if self and other are not compared directly but indirectly through comparison with surfaces in separate groups of individuals. Error bars represent SEM;  $**P < 0.01$ .

## **Supplemental Experimental Procedures**

### **Participants**

Overall 133 right-handed healthy participants (age  $23.4 \pm 4.2$ SD years) took part in six separate experiments for course credit or £6/hour. Participants were recruited on University College London campus, and were randomly assigned to perform the experiment in pairs. They did not know each other before the experiment. Only individuals without a history of mental, neurological and skin diseases took part. In addition, only females were included in the experiment to minimize variance in physical skin properties (such as hair coverage) and to keep the gender relation constant between participants and female experimenters. Hence, findings in this study may only be generalized to women's perception of touch. This is relevant because there is evidence for gender differences in the expression of touch [S1] and influences of female hormone levels on skin sensitivity [S2]. Further exclusion criteria were visible skin abnormalities in the target areas of hands and arms, for example, cuts, scrapes, wounds, scars or tattoos. Signed informed consent was obtained from all participants prior to their participation. The study was approved by the Ethics Committee of the Research Department of Clinical, Educational and Health Psychology, University College London.

### **General Experimental Set-Up**

Participants in each experiment were randomly paired to arrive at the laboratory at the same time and to perform reciprocal touch on each other, thus assuming both the role of the touch giver ('active participant') and the touch recipient ('passive participant'), in succession (see also main experimental procedures below). They were told the experiment was about the perception of tactile sensations. Upon arrival, participants were assigned a seat in the room next

to each other (30 cm apart) at the same side of a table, however, facing opposite directions. That is, the active participant was facing the computer screen on the table, and the passive participant was sitting on her left-hand side with the back to the table (see Figure 1A, main text). This set-up was chosen to provide a flexible possibility for both participants to comfortably rest their left forearms on the table by aligning them parallel to each other in a 45 degree angle relative to the active participant's body. A curtain was installed between participants to prevent visual contact between them, and the passive participant reached underneath it to place her arm in front of the active' participant. The position of the arm facing upwards allowed access to both hairy skin (forearm) and glabrous skin (palm) while maintaining constant arm position across experimental trials. The right arm (i.e., the stroking hand) of the active participant was resting on the table in front of her between trials, while the passive participant's right arm was out of view.

### **The Touch Protocol**

Prior to each of the main experiments, each active participant was trained individually according to an experimental 'touch protocol'. Equal areas of nine cm length and four cm width were marked on the volar side of the forearm and the palm of the active and passive participant, which indicated the exact site of touch. The forearm and palm are commonly used body sites in studies investigating the function of the C-tactile (CT) afferent system [S3, S4, S5], as CT afferents are found exclusively in hairy skin surfaces [e.g., arm: S6, S7] but not in the glabrous skin [e.g., palm: S8, S9]. Active participants were instructed to press lightly with three fingers of the right hand (index, middle and ring finger) against their own left arm skin ('self-touch') or the passive participant's left arm skin ('other-touch') and perform dynamic stroking movements within the marked skin area in a distal to proximal, linear direction. In experiment 2 and 3, only two fingers of the right hand (index and middle finger) were used, which allowed more precise

control of the finger-skin contact area for manipulations of stroking speed (involving precise instructions of onset and offset of finger-skin contact) or touch of external objects. The stroking movement was done at a slow speed unless the speed of stroking was explicitly manipulated (see experiment 2). Specifically, participants were instructed to cover the marked skin area (of nine cm length) within a 3 second time interval, resulting in a stroking velocity of approximately 3cm/sec. Indentation forces of  $< 0.3$  N were targeted, which was achieved by the experimenter demonstrating a finger weight of  $< 100$ gr (as determined by a digital weight scale). Specifically, during practice trials, the experimenter demonstrated the target type of finger-skin contact on participants forearm, and participants were instructed to match the touch on the experimenter's forearm. Participants were also trained to deliver the movements in synchrony with computerized visual cues (i.e., "touch now" appeared on the screen; see experiment 1, 3-5), auditory cues (i.e., sounds; see experiment 2), or followed the instructions of the experimenter (i.e., "touch now", see experiment 6). Computer-generated stimulation was controlled by a customized software program (Presentation software, Neurobehavioral Systems Inc.) and presented on a desktop computer placed at a viewing distance of approximately 80 cm. The order of self-touch and other-touch was instructed by the experimenter at the beginning of each trial. The experimenter did not proceed to the main experiment unless she felt that the active participant was able to follow this touch protocol consistently.

### **Main Experimental Procedures**

During the main part of each experiment, each touch trial lasted 12 seconds and consisted of self-touch (repeated twice successively, for a total duration of six seconds) and other-touch (repeated twice successively, for a total duration of six seconds). The order of self-touch and other-touch (i.e., self-other, other-self) events was randomized across trials in all experiments.

To account for the potential role of vision, the availability of visual information of the touched skin area differed between experiments. In some experiments, the active participant was able to see both arms (experiment 1, 4), while in others participants were blindfolded (experiment 2, 6) or a wooden board mounted above the table prevented participants from seeing their arms which were placed underneath (experiment 3, 5). In conditions without vision, participants were guided by the experimenter to the marked skin area (experiment 2, 5, 6) or were trained on all locations at the beginning of the testing session (experiment 3), and then did the stroking movement on their own.

After each touch trial, the active participant was asked to compare self-touch versus other-touch on two main sensory dimensions of tactile perception, namely softness-hardness, roughness-smoothness, and one affective dimension, namely comfortable-uncomfortable (see below for selection of these labels). The order of the dimensions was counterbalanced across trials. Judgments were made using a computerized continuous visual analogue scale (VAS, see Figure S1). For each sensory and affective dimension, a 200 mm horizontal VAS line appeared in the centre of the computer screen with a midpoint anchor and two anchor labels at each end (e.g., ‘other skin’ on the left and ‘own skin’ on the right end, counterbalanced across participants). Participants placed a mouse cursor at a selected location on the line and confirmed with a mouse click. The cursor position was converted into a numerical VAS score from -100 to 100, where zero is no perceived difference between self- and other-touch, and ratings deviating from zero being indicative of the degree to which a specific tactile sensation occurred during self-touch or other-touch.

Participants were instructed not to communicate throughout the experiment. The experimenter monitored task and touch protocol compliance throughout the whole session. After

completion of the experiment, participants reversed active and passive participant roles, such that the previously passive participant repeated the whole experimental procedure and actively touched the previously active participant. This pairing and role reversal strategy controlled for any actual individual differences in physical skin properties between participants as they performed perceptual judgments of each other's skin. To prevent systematic order effects, participants were randomly assigned to the roles at the beginning of the experiment. Moreover, the role of the order of these participant roles was explored statistically (see below).

### **Dependent Measures and Statistical Analysis**

Contrary to the plethora of studies investigating the relation between tactile stimulation parameters and discriminatory aspects of touch, there is a scarcity of data regarding such stimulus parameters and affective aspects of touch. Thus, the perceptual effects of parameters such as friction and roughness on affective touch remain poorly understood. Moreover, most of the existing studies have looked at fabric perception, finding for example that fabrics rated as soft and smooth are also perceived as pleasant [S3]. Such studies may miss important aspects of skin-to-skin contact such as arousal, warmth, or comfort. Given that the present study focused on skin-to-skin contact, we first conducted a pilot study (N = 22) to determine our dependent measures and particularly the verbal labels that may optimally capture differences between self-touch and other-touch on the skin. Participants were asked to make comparative judgments between both touch conditions with respect to relevant sensory dimensions (such as hard-soft, rough-smooth), affective properties (such as comfort, pleasure, arousal) and of a number of other control items (such as warmth, numbness) on the above visual analogue scales. These attributes have been previously shown to represent important and salient dimensions of tactile texture perception [see also, S5, S10, S11, S12, S13]. Descriptive data showed that compared to self-

touch, touching someone else's skin yielded higher ratings for softness and smoothness ( $M=43.27$  vs.  $M=32.17$ ;  $M=44.40$  vs.  $M=30.20$ ), but lower ratings for comfort ( $M=15.48$  vs.  $M=30.82$ ). None of the other items displayed any difference at the descriptive level, possibly lacking specificity or discrete meaning in this context. Indeed, qualitative feedback from participants and the opposite direction of results between softness/smoothness and comfort, suggested that verbal labels like 'pleasantness' and 'arousal' may be sub-optimal for skin-to-skin touch as they can be interpreted to include more than one of the above meanings (e.g. touching someone's else's skin may feel both pleasant in its 'softness' but unpleasant in its 'unfamiliarity'). Thus, three labels-dimensions were selected for testing in the main experiments, namely softness, smoothness and comfort.

Statistical differences between the critical within-subjects, experimental factors in each of the experiments below were assessed separately for these three selected dimensions of tactile perception (captured by the three VAS ratings following each touch trial, see procedures above) by means of repeated-measures analysis of variance (ANOVA). Post-hoc tests were performed to examine the direction of main and interaction effects. In order to specifically assess whether participants tended to attribute one of the relevant sensory dimension more towards their own or the other's skin one-sided t-tests against zero (i.e., no difference between self and other) were performed on the VAS ratings as the dependent variables. When repeated statistical tests were conducted to evaluate such biases for different VAS ratings within the same experiment, a multiple-comparison correction was used. This correction was done by applying the Bonferroni (Holm) sequential procedure, and the Bonferroni adjusted p-values are reported as  $P_{Bonf}$ . To test for order effects of participants roles (i.e., whether assuming the active or passive role first within a pair of participants), a separate repeated measures ANOVA was conducted in each

experiment with participant order as a between-subject factor and the relevant VAS rating as the dependent variable.

### **Details of Experimental Procedures of Experiments 1 to 6**

Experiment 1: In a first experiment (N=28, age  $22.6 \pm 2.0$  years, all right-handed females), we assessed whether other-touch would be associated with more positive sensory experiences than self-touch, particularly in hairy skin, as CT afferents that have been associated with greater tactile pleasure, are found in hairy, but not in glabrous (hairless) skin [S14, S15]. Participants were asked to touch the skin of the palm (glabrous skin) or the forearm (hairy skin), and compare sensations of softness, smoothness and comfort during self-touch versus other-touch. Two equal areas of nine cm were marked on the volar side of the forearm and the palm, and the touch was performed with full vision. Participants synchronized their stroking movements with computerized visual cues, resulting in a stroking velocity of approximately 3cm/sec, in accordance with the main touch protocol and experimental procedures (as described above). Each site of touch (i.e., palm and forearm) was repeated twice in both orders (i.e., self-other, other-self), for a total of eight 12 second trials. After each trial, participants were asked to make comparative judgments between self and other on the above three, separate VAS scales for softness, smoothness and comfort. The entire session took approximately 30 minutes. Questions during debriefing revealed that none of the participants had consciously experienced any systematic differences between their own and other people's skin before taking part in the experiment. However, after the experiment some of the participants did spontaneously report the feeling that the other participant's skin was softer than their own.

Experiment 2: Thirteen pairs of naïve participants (N=26, age  $22.2 \pm 2.9$  years, all right-handed females) were recruited for experiment 2 in order to further systematically investigate the

emotional significance of interpersonal touch as a possible mediator of the phenomenon observed in experiment 1. The emotional significance of touch was experimentally manipulated based on insights about the fundamental psychophysical properties of the neurophysiological system that sustains passive, affective touch. In particular, one well-established property is that C-tactile afferents are optimally stimulated by tactile stimulation speeds in the range from 1-10 cm/s (see main text). Participants performed different types of touch movements of increasing velocity on the skin during both conditions of self-touch and other-touch. Each trial consisted of either static touch or lateral motion at 3 cm/s, 10 cm/s, or 18 cm/s. Psychophysical data has shown that touch at 3 cm/s or 10 cm/s is perceived as more pleasant than touch at 18 cm/s [S3, e.g., S16]. Moreover, while stroking movements at 3 cm/s and 10 cm/s velocities are known to be optimal for CT afferent activation, faster touch and slower touch is less optimal in eliciting CT activity [S14].

These different types of movements were performed under conditions of self-touch and other-touch on the palm and forearm. Prior to the experimental trials, participants were trained to deliver the stroking movements in synchrony with computer-generated tones. During each touch trial, six tones were presented at a rate of one per second (see Figure S2). The first set of three tones signaled self-touch, followed by a pause of two seconds and a second set of three tones which signaled other-touch. During each set of three tones, the participant's task was to stroke the skin in synchrony with every tone by covering a skin area of nine cm in distal to proximal direction and by using the index and middle fingers of the right hand (see also main touch protocol). In the slow speed condition (3 cm/s), they slowly performed one stroking movement across the whole area within three seconds (i.e., for the duration of all three tones). In the medium speed condition (10 cm/s), they performed three stroking movements within three

seconds (i.e., one stroke at each tone), and in the high speed condition (18 cm/s) they performed six stroking movements within three seconds (i.e., covering the complete area twice at each tone). During the static touch condition, participants kept gentle skin contact without relative motion for the duration of all three tones. After each touch, comparative judgments between self-touch and other-touch were obtained for softness sensations by means of a VAS scale as in the first experiment (see also main procedures). The four touch conditions were presented in blocks (in random order between participants), and each trial was repeated four times for each body site, for a total of 32 trials. Throughout the experiment, participants performed the touch without vision (blindfolded).

*Experiment 3:* In a third experiment, we investigated whether the feeling of greater softness and smoothness for the other's skin can also be indirectly measured by avoiding direct self-other comparison and thereby minimizing potential biases in attention, stroking, or responding (such as social desirability bias). Nine, new pairs of naïve female participants (N=18, age  $24.8 \pm 6.9$  years, all right-handed females) were recruited for this experiment. Participants were asked to compare their own and the other participant's skin relative to external reference objects. These objects consisted of three rectangular pads (made of felt) of one cm in height and four cm in width and nine cm in length, which were covered by three different fabrics. The three fabrics were made of cotton, fleece and fur materials. Participants were seated next to each other with their arms placed in parallel on a table (as described in the main procedure), and a wooden board was mounted above the table (about 30 cm height) to prevent participants from seeing their arms and the fabrics. The fabrics were placed one at a time underneath the board on the table in front of the active participant and in equal distance from the hands of both participants (about five cm distance), and the touch was performed without vision. The spatial positions of

hands and object were marked on the table and visible only to the experimenter (sitting opposite the table) who placed the fabrics in the same location throughout the experiment to keep spatial relations constant. Participants were trained to locate the other participant's arm as well as the fabric-covered object at the beginning of the testing session.

Before the main experiment, participants were asked to judge the softness of the three fabrics separately on a VAS scale requesting an intensity rating (from 'very rough' to 'very soft'). Subsequently, in the main experiment, participants compared each fabric with their own skin or the other participant's skin in separate blocks. The touch was performed by alternating between skin-touch and fabric-touch, and touch of the skin was performed at two different body sites, forearm and palm (in separate trials). For each body site, each of the three fabrics was presented four times, resulting in a total of 24 trials of self-touch and 24 trials of other-touch. Experimental blocks of self-touch and other-touch were counterbalanced across participants, and the sequence of conditions within each block was randomized. One experimental trial lasted 12 seconds, and participants delivered the touch in synchrony with computerized visual cues (as described in the main procedure). After each trial, participants made comparative judgments concerning softness sensations using a similar VAS scale as in the experiments before, however, the two anchor labels now indicated 'skin' and 'object' (the assignment of the labels to left and right endpoints of the scale was counterbalanced across participants). That is, while in experiment 1 and 2 participants made direct self-other comparisons, in experiment 3 they made direct skin-object comparisons.

*Experiment 4:* Eighteen pairs of naïve participants (N=36, age  $23.8 \pm 3.9$  years, all right-handed females) were recruited to test the potential role of spatial proximity in the SSI. The results of experiment 1 and 2 suggested that the illusion of feeling greater softness for someone

else's skin depends on the emotional significance of touch associated with the stimulation of CT afferents that are known to innervate hairy skin. This interpretation is in line with experiment 1 in which the SSI only appeared for touch of the forearm (hairy skin) but not the palm (glabrous skin). However, as the forearm is more proximal than the palm, the contribution of spatial proximity and related salience effects cannot be ruled out. Therefore, experiment 4 tested the hypothesis that if spatial proximity does not contribute to the SSI, touch on both proximal and distal locations of self and other forearm should show the illusion. Participants were asked to perform touch at proximal and distal locations of the forearm on self and other, and comparative judgments concerning softness, smoothness and comfort were obtained after each comparison (same procedure as in experiment 1). Two equal areas of nine cm were marked on the volar side of the lower and upper part of the forearms of both participants indicating the exact site of touch. The touch was performed with full vision and in accordance with the touch protocol and experimental procedures, as described above. Each of the two sites of touch (i.e., upper and lower forearm) was repeated twice in both orders (i.e., self-other, other-self), for a total of eight trials. Participants delivered the movements in synchrony with computerized visual cues, resulting in a stroking velocity of approximately 3 cm/sec (see main procedures).

*Experiment 5:* The results of experiment 3 and 4 suggested that the SSI is unlikely to result from more general top-down response biases. Experiment 5 aimed at further understanding its specificity with respect to bottom-up sensory signals and top-down social factors, by testing whether similar self-touch and other-touch judgments would lead to the SSI, when there was no availability of sensory information from direct skin contact. Thirteen pairs of naïve female participants (N=26, age  $22.2 \pm 2.8$  years, all right-handed females) were recruited for this experiment and asked to compare the effects of self-touch and other-touch on fabrics attached to

the palm or forearm of another person and to their own. Fabrics were attached to both (active and passive) participants' forearms such that the skin was fully covered and self-touch and other-touch was performed as described in the Main Experimental Procedures (see above), however without direct skin contact. Identical pieces of cotton fabric were wrapped around the forearm and palm of active and passive participant and they both were blindfolded during the procedure of attaching the fabrics to exclude influences of prior visual information. The velocity of touch and the extent of movement was demonstrated and monitored throughout the session by the experimenter. During the touch participants were not blindfolded, but a wooden board mounted above the table (as in experiment 3) prevented participants from seeing their arms which were placed underneath the table. The touch was performed on three different sites of touch, upper and lower forearm and palm, in random order with four trials per condition, resulting in a total of 12 trials. The stroking movement was guided by computerized visual instructions and performed in accordance with the touch protocol and experimental procedures, as described above. Again, participants were asked to make several comparative judgments between self-touch and other-touch (as before), however, this time referring to properties of the fabrics attached to their own versus the other participant's skin. After each touch trial the same VAS rating appeared as in experiment 1 (see also main procedure), however, instead of the labels 'other skin' and 'own skin' the anchor labels were changed into 'own fabric' and 'other fabric'.

*Experiment 6:* A sample of 11 pairs of participants (N=22, age  $24.1 \pm 3.9$  years, all right-handed females) took part in experiment 6 which aimed at investigating whether the observed illusion is the result of predictive mechanism related to the voluntary control of action and leading to sensory self-attenuation (see main text). To test this hypothesis, the degree of voluntary control over the stroking movement was varied. Participants were asked to rate the

skin softness while they were actively or passively touching their own skin or the other participant's skin on the forearm. In a passive movement condition, the movements were fully controlled by the experimenter who manually guided the participant's right hand. In two active touch conditions, participant's performed the touch either alone (individual active touch) or was joint by the experimenter (joint active touch) who touched the participant's hand during the movement however without interfering or guiding the hand as in the passive movement condition. That is, in both active touch conditions, participants fully controlled (i.e., initiated and executed) the movement themselves. The joint active touch condition served to control for potential influences of attentional distraction on perceptual judgments in the passive touch condition due to the presence of the experimenter and tactile sensations during guidance of the hand. The three action conditions were tested in separate blocks (order counterbalanced across participants), with 4 trials per action condition for a total of 12 trials. Participants were blindfolded during the touch and alternated between self-touch and other-touch within each trial. The touch trials were practiced and performed in accordance with the touch protocol and experimental procedures, as described above.

### **Supplemental Analysis of Experiments 1 to 6**

Experiment 1: A repeated measures ANOVA was calculated separately on the average VAS scores for each measure (comfort, softness, smoothness) with the factor Site (two levels: palm, forearm) as a within-subject factor. We found a significant main effect of Site for both perceived softness ( $F(1, 27) = 9.34, P < 0.01$ ) and smoothness ( $F(1, 27) = 6.79, P < 0.05$ ). Moreover, a significant effect of Site on perceived comfort was found ( $F(1, 27) = 6.08, P < 0.05$ ). In order to test for the direction of these effects, we conducted further post-hoc one-sided t-tests (means against zero difference between self and other), which were Bonferroni corrected

for six comparisons (i.e., three dependent measures at two body sites). These post-hoc tests showed that participants significantly judged the other's forearm skin to be softer ( $t = -4.00$ ;  $P_{Bonf} = 0.002$ ) and smoother ( $t = -3.41$ ;  $P_{Bonf} = 0.008$ ) than their own forearm skin (see Figure 1B, main text). For the palm, no difference in experienced skin softness ( $P_{Bonf} > 0.9$ ) or smoothness ( $P_{Bonf} = 0.76$ ) was found. For touch of the palm, however, other-touch was experienced as less comfortable than self-touch ( $t = 4.87$ ;  $P_{Bonf} < 0.001$ ), but this difference was not significant for the forearm ( $P_{Bonf} > 0.9$ ; see also experiment 3). Separate repeated measures ANOVAs testing for order effects of participants roles (see experimental procedures) revealed no significant effect on any type of VAS rating, softness ( $P = 0.39$ ), smoothness ( $P = 0.52$ ) or comfort ( $P = 0.17$ ).

Experiment 2: A repeated-measures ANOVA with two factors Site (two levels: palm, forearm) and Velocity (four levels: 3 cm/s, 10 cm/s, 18 cm/s, static touch) was calculated on softness ratings. Results revealed a significant main effect of Velocity ( $F(3, 81) = 3.08$ ,  $P = 0.03$ ), but no significant main effect or interaction effect involving the factor Site (all  $P$ -values  $> 0.59$ ). Subsequently, the VAS ratings were averaged across both sites and the direction of the main effect of Velocity was tested by means of post-hoc one-sided t-tests (means against zero difference between self and other) which were Bonferroni corrected for four comparisons (i.e., four velocities). The SSI appeared most strongly during 3 cm/sec ( $t = -2.74$ ;  $P_{Bonf} = 0.03$ ) and 10 cm/sec ( $t = -3.69$ ;  $P_{Bonf} = 0.004$ ; see Figure 2A), but was absent during 18 cm/sec touch ( $P_{Bonf} > 0.9$ ) or static touch ( $P_{Bonf} = 0.77$ ). A repeated measures ANOVA testing for general order effects of participants roles (see experimental procedures) revealed no significant effect on softness ratings ( $P = 0.44$ ).

Experiment 3: Judgements of softness of the three fabrics separately indicated that perceived softness differed significantly between the fabrics, as revealed by a repeated measures

ANOVA main effect of Fabric (cotton, fleece, fur; ( $F(2, 34) = 54.55, P < 0.001$ ). Post-hoc Bonferroni tests (corrected for three comparisons) indicated that all three fabrics differed significantly from each other (all  $P_s < 0.001$ ), with fur receiving the highest softness ratings ( $M=73.74$ ), followed by fleece ( $M=34.37$ ), and cotton being perceived as neutral to slightly rough ( $M=-10.95$ ). This confirmed the choice of materials for manipulating stimulus softness. To examine the direction of effects on the rough-soft dimension, one-sided t-tests (means against zero, indicating neither rough nor soft) were performed, Bonferroni corrected for three tests (i.e., the three Fabric conditions). The results showed that fur and fleece were judged to be soft (all  $P_{Bonf} < 0.001$ ), while cotton was judged to be neither rough nor soft ( $P_{Bonf} = 0.21$ ).

A repeated measures ANOVA with the three factors Fabric (three levels: fur, fleece, cotton), Site (two levels: forearm, palm), and Self-Other (two levels: self-touch, other-touch) was calculated on softness ratings. This analysis revealed three significant main effects, without any significant interaction between them (all  $P_s > 0.37$ ). The significant main effect of Fabric ( $F(2, 34) = 27.02, P < 0.001$ ) confirmed the difference in perceived softness between materials. A main effect of Site ( $F(1, 17) = 8.69, P = 0.01$ ) indicated that the forearm skin was generally perceived as softer than the palm relative to fabrics attached to an external object. The main effect of Self-Other ( $F(1, 17) = 10.95, P = 0.004$ ) indicated that, relative to fabrics of varying softness, the other's skin (other-touch) was judged as being on average softer than one's own skin (self-touch). In order to specifically assess whether participants tended to experience more softness during touch of the skin or touch of the fabric one-sided t-tests against zero (i.e., no difference between skin and fabric) were performed on the mean VAS ratings (averaged across the fabrics), separately for the different conditions of the experimental factors Site and Self-Other. These post-hoc tests were Bonferroni corrected for four comparisons (i.e., separate tests

conducted for self- and other-touch on palm and forearm). The results showed that other-touch on the forearm was rated to be softer compared to the fabrics on average ( $t = -3.11$ ;  $P_{Bonf} = 0.02$ ). By contrast, other-touch on the palm or self-touch on forearm and palm was rated to be equally soft compared to the fabrics (all  $P_{Bonf} > 0.19$ ). A separate repeated measures ANOVA testing for order effects of participants roles (see experimental procedures) revealed no significant effect on softness ratings ( $P = 0.98$ ), and there was no significant interaction between order and any of the three experimental factors (i.e., Fabric, Site and Self-Other; all  $P_s > 0.33$ ).

Experiment 4: A repeated measures ANOVA was calculated with the factor Site (two levels: proximal, distal) as a within-subject factor. No significant main effect of Site was revealed for perceived softness ( $P = 0.83$ ), smoothness ( $P = 0.87$ ) or comfort ( $P = 0.67$ ). One-sided t-tests (means against zero difference between self and other) were performed, Bonferroni corrected for six comparisons (i.e., three dependent measures at two body sites). These tests showed that the SSI was present at both for proximal touch ( $t = -2.91$ ;  $P_{Bonf} = 0.02$ ; touch of the upper forearm) and distal touch ( $t = -3.00$ ;  $P_{Bonf} = 0.02$ ; touch of the lower forearm). Similar results were obtained for smoothness ratings for upper forearm ( $t = -3.25$ ;  $P_{Bonf} = 0.01$ ) and lower forearm ( $t = -3.09$ ;  $P_{Bonf} = 0.02$ ). No significant effect for comfort ratings was revealed on the upper forearm ( $P_{Bonf} = 0.24$ ) or lower forearm ( $P_{Bonf} = 0.19$ ). Separate repeated measures ANOVAs testing for order effects of participant roles (see experimental procedures) revealed no significant effect on any type of VAS rating, softness ( $P = 0.51$ ), smoothness ( $P = 0.96$ ) or comfort ratings ( $P = 0.69$ ).

Experiment 5: A repeated measures ANOVA was calculated with the factor Site (three levels: upper forearm, lower forearm, palm) as a within-subject factor. The main effect of Site on perceived softness did not reach significance ( $F(2, 50) = 2.84$ ,  $P = 0.07$ ), and no main effect of

Site was present for perceived smoothness ( $P = 0.39$ ) or comfort ( $P = 0.89$ ). For softness ratings at the descriptive level, the SSI appeared to be reversed for the upper and lower forearm and appeared to emerge for the palm. To test for the significance of these observations, one-sided-t-tests were performed, Bonferroni corrected for three tests (i.e., three different body sites). These tests revealed that the SSI was not present at any of the three sites of touch (upper forearm,  $P_{Bonf} = 0.54$ ; lower forearm,  $P_{Bonf} = 0.39$ ; palm  $P_{Bonf} = 0.14$ ). A separate repeated measures ANOVA testing for order effects of participants roles (see experimental procedures) revealed no significant effect of order on ratings of fabric softness ( $P = 0.52$ ).

Experiment 6: A repeated measures ANOVA with the factor Action (three levels: individual, joint, passive) showed a significant main effect on softness ratings ( $F(2, 42) = 12.66$ ,  $P < 0.001$ ; see Figure 2B). Bonferroni-corrected post-hoc comparisons revealed that the passive action condition differed significantly from the individual action condition ( $P_{Bonf} < 0.001$ ) and the joint action condition ( $P_{Bonf} = 0.01$ ), without a difference between the latter two ( $P_{Bonf} = 0.27$ ). Further one-sided t-tests (means against zero difference between self and other) tested for the direction of these effects and were Bonferroni corrected for three tests (i.e., the three Action conditions). These tests showed that the SSI was present for both individual actions ( $t = -3.77$ ;  $P_{Bonf} = 0.003$ ) and joint actions ( $t = -2.89$ ;  $P_{Bonf} = 0.02$ ) but disappeared in the passive action condition ( $P_{Bonf} = 0.54$ ). There was no significant effect of order of participant roles (see experimental procedures) on softness ratings ( $P > 0.69$ ). Moreover, the experimental action conditions did not differ significantly with respect to the reported comfort experience ( $P = 0.17$ ), according to a separate repeated measures ANOVA performed on comfort ratings.

## **Supplemental Discussion**

### Multisensory Effects

Given that some but not all of our experiments involved an interplay between vision and tactile processing, the SSI could be accounted for by multisensory integration effects. Such an interpretation would rely on observations of cross-modal influences taking place at early levels of sensory-specific processing [S17], and research indicating the involvement of primary somatosensory cortex (S1) even when touch is merely observed [S18]. The large size of the SSI in Experiment 1 could be explained by the availability of visual input, which was controlled for example by blindfolding participants in Experiment 2, in which a much smaller SSI was observed. One might speculate that simply viewing the body part may facilitate simulation mechanisms and thereby lead to an increase in self-other differentiation in tactile perception. Indeed, a recent study demonstrated that observed touch directed to another person's hand elicits spatially similar brain activations, and to a larger degree, than when touch of one's own hand is observed [S19]. Moreover, viewing CT-optimal touch (i.e., observed caress) gives rise to a similar response in the posterior insula as directly felt caressing touch [S20]. Given the pattern of results and specificity of the SSI across experiments, however, it is very unlikely that visual influences alone or general attentional differences between self-touch and other-touch can account for the SSI. Instead, in our study, the illusion varied most strongly with the affective significance of the touch (Experiment 2) and the presence of motor control signals (Experiment 6). Moreover, apart from a lack of visual input, the reduced size of the SSI in Experiment 2 could also be explained by the additional auditory input (i.e., simultaneous touch guidance) and increased task difficulty (i.e., different stroking speeds). Taken together, even though the SSI may be potentially enhanced by vision, it cannot be explained by multisensory effects alone.

#### *Comfort Ratings and Touch of the Palm*

Comfort experience is a relevant dimension of social touch, and touching a stranger is typically accompanied by a normal feeling of uncomfortableness as compared to self-touch. Surprisingly, in Experiment 1, this tendency was found only for touch of the palm but not for the forearm which was rated as being equally comfortable to touch for self and other. One possible explanation of these results might be the simultaneous focus on rewarding tactile dimensions of the haptic experience of skin texture such as softness and smoothness which may have influenced comfort ratings. Comfort experience is a dimension, similar to pleasure, which can be composed of more than one meaning, from social contextual cues to basic haptic sensations. Hence, the experienced haptic illusion of increased softness of another's skin may have overruled the normal uncomfortableness induced by the social context of touching the forearm of an unfamiliar other person. This was not the case for touch of the palm for which the softness illusion was absent.

It should also be noted that the site specificity of the SSI showed some meaningful variability across experiments. While significant differences between body sites (palm vs. forearm) were found in Experiment 1 and 3, no significant interactions involving the site of touch were observed in Experiment 2 (please also see above regarding the more general and multisensory integration reasons regarding the smaller SSI effects in this experiment). The SSI appeared in Experiment 2 not only for touch of the forearm but also the palm, but only when the touch was performed at stroking speeds of 3 cm/s or 10 cm/s that are optimal for stimulation of slow-conducting unmyelinated C-tactile afferents [S6, S7, S21]. CT afferents innervating the hairy skin of the body have been shown to convey cutaneous sensations to brain structures related to emotion [S6, S7, S15] and thereby contribute to hedonic ratings [S14]. The palm is a glabrous skin site which is devoid of CT afferent innervations [S22, S23], however, previous

studies investigating passive touch of the palm have found that CT optimal stroking of the palm increases pleasantness ratings in comparison to non-CT optimal velocities [S4, S24] and such ratings can be affected by previous touch on CT-innervated hairy skin [S25]. These effects point to the importance of learned experiences associated with touch in CT optimal speeds even when one is touched on the palm. Thus, it seems likely that similar top-down influences based on learned experiences of touch pleasure may contribute to the SSI, over and above the actual, bottom-up activation of the CT afferent system.

## Supplemental References

- S1. Hertenstein, M.J., and Keltner, D. (2011). Gender and the Communication of Emotion Via Touch. *Sex Roles* 64, 70-80.
- S2. Gallace, A., and Spence, C. (2014). In touch with the future: The sense of touch from cognitive neuroscience to virtual reality (Oxford, UK: Oxford University Press).
- S3. Essick, G.K., McGlone, F., Dancer, C., Fabricant, D., Ragin, Y., Phillips, N., Jones, T., and Guest, S. (2010). Quantitative assessment of pleasant touch. *Neurosci Biobehav Rev* 34, 192-203.
- S4. McGlone, F., Olausson, H., Boyle, J.A., Jones-Gotman, M., Dancer, C., Guest, S., and Essick, G. (2012). Touching and feeling: differences in pleasant touch processing between glabrous and hairy skin in humans. *Eur J Neurosci* 35, 1782-1788.
- S5. Guest, S., Essick, G., Dessirier, J.M., Blot, K., Lopetcharat, K., and McGlone, F. (2009). Sensory and affective judgments of skin during inter- and intrapersonal touch. *Acta Psychol (Amst)* 130, 115-126.
- S6. Vallbo, A., Olausson, H., Wessberg, J., and Norrsell, U. (1993). A system of unmyelinated afferents for innocuous mechanoreception in the human skin. *Brain Res* 628, 301-304.
- S7. Vallbo, A.B., Olausson, H., and Wessberg, J. (1999). Unmyelinated afferents constitute a second system coding tactile stimuli of the human hairy skin. *J Neurophysiol* 81, 2753-2763.
- S8. Olausson, H., Wessberg, J., Morrison, I., McGlone, F., and Vallbo, A. (2010). The neurophysiology of unmyelinated tactile afferents. *Neurosci Biobehav Rev* 34, 185-191.
- S9. Johnson, K.O., Yoshioka, T., and Vega-Bermudez, F. (2000). Tactile functions of mechanoreceptive afferents innervating the hand. *J Clin Neurophysiol* 17, 539-558.
- S10. Hollins, M., Faldowski, R., Rao, S., and Young, F. (1993). Perceptual dimensions of tactile surface texture: a multidimensional scaling analysis. *Percept Psychophys* 54, 697-705.
- S11. Hollins, M., Bensmaia, S., Karlof, K., and Young, F. (2000). Individual differences in perceptual space for tactile textures: evidence from multidimensional scaling. *Percept Psychophys* 62, 1534-1544.
- S12. Picard, D., Dacremont, C., Valentin, D., and Giboreau, A. (2003). Perceptual dimensions of tactile textures. *Acta Psychol (Amst)* 114, 165-184.
- S13. Guest, S., Dessirier, J.M., Mehrabyan, A., McGlone, F., Essick, G., Gescheider, G., Fontana, A., Xiong, R., Ackerley, R., and Blot, K. (2011). The development and

validation of sensory and emotional scales of touch perception. *Atten Percept Psychophys* 73, 531-550.

- S14. Loken, L.S., Wessberg, J., Morrison, I., McGlone, F., and Olausson, H. (2009). Coding of pleasant touch by unmyelinated afferents in humans. *Nat Neurosci* 12, 547-548.
- S15. Olausson, H., Lamarre, Y., Backlund, H., Morin, C., Wallin, B.G., Starck, G., Ekholm, S., Strigo, I., Worsley, K., Vallbo, A.B., and Bushnell, M.C. (2002). Unmyelinated tactile afferents signal touch and project to insular cortex. *Nat Neurosci* 5, 900-904.
- S16. Crucianelli, L., Metcalf, N.K., Fotopoulou, A.K., and Jenkinson, P.M. (2013). Bodily pleasure matters: velocity of touch modulates body ownership during the rubber hand illusion. *Front Psychol* 4, 703.
- S17. Driver, J., and Noesselt, T. (2008). Multisensory interplay reveals crossmodal influences on 'sensory-specific' brain regions, neural responses, and judgments. *Neuron* 57, 11-23.
- S18. Blakemore, S.J., Bristow, D., Bird, G., Frith, C., and Ward, J. (2005). Somatosensory activations during the observation of touch and a case of vision-touch synaesthesia. *Brain* 128, 1571-1583.
- S19. Kuehn, E., Trampel, R., Mueller, K., Turner, R., and Schutz-Bosbach, S. (2013). Judging roughness by sight--a 7-Tesla fMRI study on responsivity of the primary somatosensory cortex during observed touch of self and others. *Hum Brain Mapp* 34, 1882-1895.
- S20. Morrison, I., Bjornsdotter, M., and Olausson, H. (2011). Vicarious responses to social touch in posterior insular cortex are tuned to pleasant caressing speeds. *J Neurosci* 31, 9554-9562.
- S21. Wessberg, J., Olausson, H., Fernstrom, K.W., and Vallbo, A.B. (2003). Receptive field properties of unmyelinated tactile afferents in the human skin. *J Neurophysiol* 89, 1567-1575.
- S22. Johansson, R.S., and Vallbo, A.B. (1979). Tactile sensibility in the human hand: relative and absolute densities of four types of mechanoreceptive units in glabrous skin. *J Physiol* 286, 283-300.
- S23. Kakuda, N. (1992). Conduction velocity of low-threshold mechanoreceptive afferent fibers in the glabrous and hairy skin of human hands measured with microneurography and spike-triggered averaging. *Neurosci Res* 15, 179-188.
- S24. Ackerley, R., Saar, K., McGlone, F., and Backlund Wasling, H. (2014). Quantifying the sensory and emotional perception of touch: differences between glabrous and hairy skin. *Front Behav Neurosci* 8, 34.
- S25. Loken, L.S., Evert, M., and Wessberg, J. (2011). Pleasantness of touch in human glabrous and hairy skin: order effects on affective ratings. *Brain Res* 1417, 9-15.
